# Supplementary material for: Decoding Diffuse Midline Gliomas: A Comprehensive Review of Pathogenesis, Diagnosis and Treatment
Source: MDPI journal article supplement (doi:10.3390/cancers15194869), 2023-10-06
Supplement: s1 [file s1]

# Decoding Diffuse Midline Gliomas: A Comprehensive Review of Pathogenesis, Diagnosis, and Treatment (Supplementary Material)

Sarah Al Sharie, Dima Abu Laban and Maysa Al-Hussaini

Table S1. All currently available clinical trials examining DMG and DIPG.

| NCT Number  | Title                                                                                                                                                           | Status                 | Phases              | Study Type     | Interventions                                                                                                                                                 | Number of enrolled patients | Age                 | Location | Start Date        | Completion Date    | Publication         |
|-------------|-----------------------------------------------------------------------------------------------------------------------------------------------------------------|------------------------|---------------------|----------------|---------------------------------------------------------------------------------------------------------------------------------------------------------------|-----------------------------|---------------------|----------|-------------------|--------------------|---------------------|
| NCT02420613 | Vorinostat and Temozolomide With or Without Radiation Therapy in Treating Younger Patients With Newly Diagnosed or Progressive Diffuse Intrinsic Pontine Glioma | Active, not recruiting | Phase 1             | Interventional | Drug: Temozolomide, Vorinostat<br>Radiation: Radiation Therapy                                                                                                | 18                          | 7 Months - 21 Years | USA      | October 5, 2015   | October 31, 2023   | <a href="#">[1]</a> |
| NCT02525692 | Oral ONC201 in Recurrent GBM, H3 K27M Glioma, and Midline Glioma                                                                                                | Active, not recruiting | Phase 2             | Interventional | Drug: ONC201                                                                                                                                                  | 89                          | ≥ 16 Years          | USA      | January 2016      | December 2023      | <a href="#">[2]</a> |
| NCT02717455 | Trial of Panobinostat in Children With Diffuse Intrinsic Pontine Glioma                                                                                         | Active, not recruiting | Phase 1             | Interventional | Drug: LBH589                                                                                                                                                  | 53                          | 2 - 21 Years        | USA      | June 28, 2016     | March 31, 2024     | N/A                 |
| NCT02960230 | H3.3K27M Peptide Vaccine With Nivolumab for Children With Newly Diagnosed DIPG and Other Gliomas                                                                | Active, not recruiting | Phase 1/<br>Phase 2 | Interventional | Biological: K27M peptide<br>Drug: Nivolumab                                                                                                                   | 50                          | 3 - 21 Years        | USA      | November 18, 2016 | November 30, 2024  | <a href="#">[3]</a> |
| NCT03033992 | Optune for Children With High-Grade Glioma or Ependymoma, and Optune With Radiation Therapy for Children With DIPG                                              | Active, not recruiting | -                   | Interventional | Device: Optune System (NovoTTF-200A System, Tumor Treating Fields, TTFields)<br>Combination Product: Concurrent Optune and RT followed by Optune System alone | 80                          | 3 - 21 Years        | USA      | April 4, 2017     | August 28, 2029    | <a href="#">[4]</a> |
| NCT03257631 | A Study of Pomalidomide Monotherapy for Children and Young Adults With Recurrent or Progressive Primary Brain Tumors                                            | Active, not recruiting | Phase 2             | Interventional | Drug: Pomalidomide                                                                                                                                            | 53                          | 1 Year - 21 Years   | USA      | August 22, 2017   | September 27, 2023 | <a href="#">[5]</a> |
| NCT03389802 | Phase I Study of APX005M in Pediatric CNS Tumors                                                                                                                | Active, not recruiting | Phase 1             | Interventional | Biological: APX005M treatment for newly diagnosed DIPG patients                                                                                               | 32                          | 1 Year - 21 Years   | USA      | March 1, 2018     | March 31, 2024     | N/A                 |
| NCT03416530 | ONC201 in Pediatric H3 K27M Gliomas                                                                                                                             | Active, not recruiting | Phase 1             | Interventional | Drug: ONC201                                                                                                                                                  | 130                         | 2 - 18 Years        | USA      | January 29, 2018  | May 31, 2023       | <a href="#">[6]</a> |
| NCT03478462 | Dose Escalation Study of CLR 131 in Children, Adolescents, and Young Adults With Relapsed or Refractory Malignant Tumors Including But                          | Active, not recruiting | Phase 1             | Interventional | Drug: CLR 131                                                                                                                                                 | 30                          | 2 - 25 Years        | USA      | April 30, 2019    | December 2024      | <a href="#">[7]</a> |

|             |                                                                                                                                                                                   |                        |                 |                                               |                                                                                                                |     |                      |         |                    |                   |                      |
|-------------|-----------------------------------------------------------------------------------------------------------------------------------------------------------------------------------|------------------------|-----------------|-----------------------------------------------|----------------------------------------------------------------------------------------------------------------|-----|----------------------|---------|--------------------|-------------------|----------------------|
|             | Not Limited to Neuroblastoma, Rhabdomyosarcoma, Ewings Sarcoma, and Osteosarcoma                                                                                                  |                        |                 |                                               |                                                                                                                |     |                      |         |                    |                   |                      |
| NCT03620032 | Study of Re-irradiation at Relapse Versus RT and Multiple Elective rt Courses                                                                                                     | Active, not recruiting | Phase 2         | Interventional                                | Drug: Nimotuzumab, Vinorelbine<br>Other: Radiotherapy                                                          | 54  | 2 - 21 Years         | Italy   | November 2, 2015   | November 2, 2024  | <a href="#">[8]</a>  |
| NCT03739372 | Clinical Benefit of Using Molecular Profiling to Determine an Individualized Treatment Plan for Patients With High Grade Glioma                                                   | Active, not recruiting | -               | Interventional                                | Other: Specialized tumor board recommendation                                                                  | 44  | < 21 Years           | USA     | November 28, 2018  | January 1, 2027   | <a href="#">[9]</a>  |
| NCT03893487 | Fimepinostat in Treating Brain Tumors in Children and Young Adults                                                                                                                | Active, not recruiting | Early Phase 1   | Interventional                                | Drug: Fimepinostat<br>Procedure: Therapeutic Conventional Surgery                                              | 30  | 3 - 39 Years         | USA     | August 7, 2019     | December 1, 2027  | N/A                  |
| NCT04239092 | 9-ING-41 in Pediatric Patients With Refractory Malignancies.                                                                                                                      | Active, not recruiting | Phase 1         | Interventional                                | Drug: 9-ING-41, Irinotecan, Temozolomide, Cyclophosphamide, Topotecan                                          | 68  | < 22 Years           | USA     | June 5, 2020       | December 2024     | <a href="#">[10]</a> |
| NCT04295759 | INCB7839 in Treating Children With Recurrent/Progressive High-Grade Gliomas                                                                                                       | Active, not recruiting | Phase 1         | Interventional                                | Drug: INCB7839                                                                                                 | 13  | 3 - 21 Years         | USA     | July 27, 2020      | June 30, 2024     | N/A                  |
| NCT04341311 | Phase I Study of Marizomib + Panobinostat for Children With DIPG                                                                                                                  | Active, not recruiting | Phase 1         | Interventional                                | Drug: Marizomib, Panobinostat                                                                                  | 45  | < 21 Years           | USA     | August 10, 2020    | December 31, 2024 | N/A                  |
| NCT04804709 | Non-Invasive Focused Ultrasound (FUS) With Oral Panobinostat in Children With Progressive Diffuse Midline Glioma (DMG)                                                            | Active, not recruiting | Phase 1         | Interventional                                | Drug: Panobinostat 15 MG<br>Device: Focused Ultrasound with neuro-navigator-controlled sonication              | 3   | 4 - 21 Years         | USA     | July 28, 2021      | December 2025     | N/A                  |
| NCT04870944 | CBL0137 for the Treatment of Relapsed or Refractory Solid Tumors, Including CNS Tumors and Lymphoma                                                                               | Active, not recruiting | Phase 1/Phase 2 | Interventional                                | Drug: FACT Complex-targeting Curaxin CBL0137                                                                   | 38  | 12 Months - 30 Years | USA     | January 18, 2022   | December 31, 2026 | N/A                  |
| NCT04911621 | Adjuvant Dendritic Cell Immunotherapy for Pediatric Patients With High-grade Glioma or Diffuse Intrinsic Pontine Glioma                                                           | Active, not recruiting | Phase 1/Phase 2 | Interventional                                | Biological: Dendritic cell vaccination + temozolomide-based chemoradiation +- conventional next-line treatment | 10  | 12 Months - 17 Years | Belgium | September 10, 2021 | June 1, 2027      | N/A                  |
| NCT05518838 | Expanded Access to OKN-007 for Patients With Diffuse Midline Glioma, H3 K27-altered                                                                                               | Available              | -               | Expanded Access: Intermediate-size Population | Drug: OKN-007                                                                                                  | -   | 13 Months - 18 Years | USA     | -                  | -                 | N/A                  |
| NCT00028795 | Chemotherapy and Radiation Therapy After Surgery in Treating Children With Newly Diagnosed Astrocytoma, Glioblastoma Multiforme, Gliosarcoma, or Diffuse Intrinsic Pontine Glioma | Completed              | Phase 2         | Interventional                                | Drug: temozolomide<br>Radiation therapy                                                                        | 170 | 3-21 Years           | USA     | December 2002      | March 2012        | N/A                  |
| NCT00036569 | A Phase II Study of Pegylated Interferon Alfa 2b (PEG-Intron(Trademark)) in Children With Diffuse Pontine Gliomas                                                                 | Completed              | Phase 2         | Interventional                                | Procedure: adjuvant therapy<br>Biological: pegylated interferon alfa                                           | 32  | < 21 Years           | USA     | May 2002           | January 2012      | N/A                  |

|             |                                                                                                                                                                                        |           |                 |                |                                                                                                                                                         |    |                      |         |                   |                    |                      |
|-------------|----------------------------------------------------------------------------------------------------------------------------------------------------------------------------------------|-----------|-----------------|----------------|---------------------------------------------------------------------------------------------------------------------------------------------------------|----|----------------------|---------|-------------------|--------------------|----------------------|
| NCT00561691 | Nimotuzumab in Children With Intrinsic Pontine Glioma                                                                                                                                  | Completed | -               | Observational  | -                                                                                                                                                       | 41 | 3 - 20 Years         | Germany | April 2006        | January 2012       | N/A                  |
| NCT00600054 | Phase 2 Study of Nimotuzumab in Pediatric Recurrent Diffuse Intrinsic Pontine Glioma                                                                                                   | Completed | Phase 2         | Interventional | Drug: nimotuzumab                                                                                                                                       | 44 | 3 - 18 Years         | USA     | October 2007      | December 2010      | N/A                  |
| NCT00879437 | Valproic Acid, Radiation, and Bevacizumab in Children With High Grade Gliomas or Diffuse Intrinsic Pontine Glioma                                                                      | Completed | Phase 2         | Interventional | Drug: Valproic acid, Bevacizumab<br>Radiation: Radiation therapy                                                                                        | 38 | 3 - 21 Years         | USA     | September 1, 2009 | October 2, 2017    | <a href="#">[11]</a> |
| NCT00890786 | A Study of Bevacizumab Therapy in Patients With Newly Diagnosed High-Grade Gliomas and Diffuse Intrinsic Pontine Gliomas                                                               | Completed | Early Phase 1   | Interventional | Drug: Temozolomide, Bevacizumab, Irinotecan                                                                                                             | 27 | 3 - 30 Years         | USA     | May 2009          | December 2017      | N/A                  |
| NCT00996723 | Clinical Trial Evaluating the Combination of Vandetanib and Dasatinib During and After Radiation Therapy (RT) in Children With Newly Diagnosed Diffuse Intrinsic Pontine Glioma (DIPG) | Completed | Phase 1         | Interventional | Drug: Vandetanib, Dasatinib                                                                                                                             | 25 | 18 Months - 21 Years | USA     | October 2009      | June 2014          | N/A                  |
| NCT01165333 | Cilengitide in Combination With Irradiation in Children With Diffuse Intrinsic Pontine Glioma                                                                                          | Completed | Phase 1         | Interventional | Drug: Cilengitide<br>Radiation: Concomitant radiotherapy<br>Biological: Pharmacokinetic, Pharmacogenetic and Exploratory investigation                  | 32 | 6 Months - 21 Years  | France  | August 2010       | March 2015         | N/A                  |
| NCT01189266 | Vorinostat and Radiation Therapy Followed by Maintenance Therapy With Vorinostat in Treating Younger Patients With Newly Diagnosed Diffuse Intrinsic Pontine Glioma                    | Completed | Phase 1/Phase 2 | Interventional | Drug: Vorinostat<br>Radiation: 3-Dimensional Conformal Radiation Therapy, Intensity-Modulated Radiation Therapy<br>Other: Laboratory Biomarker Analysis | 79 | 37 Months - 21 Years | USA     | August 9, 2010    | September 30, 2021 | <a href="#">[12]</a> |
| NCT01222754 | Lenalidomide and Radiation Therapy in High Grade Gliomas or Diffuse Intrinsic Pontine Gliomas                                                                                          | Completed | Phase 1         | Interventional | Drug: Lenalidomide<br>Radiation: XRT, 54-59.4 Gy                                                                                                        | 29 | 1 Year - 21 Years    | USA     | November 23, 2010 | April 17, 2019     | <a href="#">[13]</a> |
| NCT01393912 | PDGFR Inhibitor Crenolanib in Children/Young Adults With Diffuse Intrinsic Pontine Glioma or Recurrent High-Grade Glioma                                                               | Completed | Phase 1         | Interventional | Drug: Crenolanib                                                                                                                                        | 55 | 18 Months - 21 Years | USA     | July 2011         | October 2016       | <a href="#">[14]</a> |
| NCT01445288 | Exploratory Study of Effects of Radiation Therapy in Pediatric Patients With Central Nervous System Tumors                                                                             | Completed | -               | Observational  | -                                                                                                                                                       | 76 | 1 Month - 21 Years   | USA     | December 5, 2006  | -                  | N/A                  |
| NCT01469247 | Diffuse Intrinsic Pontine Glioma (DIPG) Reirradiation (ReRT)                                                                                                                           | Completed | Phase 1/Phase 2 | Interventional | Radiation: Radiation Therapy                                                                                                                            | 12 | < 17 Years           | USA     | December 7, 2011  | September 20, 2022 | <a href="#">[15]</a> |
| NCT01502917 | Convection-Enhanced Delivery of 124I-Omburtamab for Patients With Non-Progressive                                                                                                      | Completed | Phase 1         | Interventional | Drug: Radioactive iodine-labeled monoclonal antibody                                                                                                    | 50 | 2 - 21 Years         | USA     | December 2011     | January 2022       | <a href="#">[16]</a> |

|             |                                                                                                                                                                                             |           |                     |                |                                                                                                                                                                                             |     |                      |                   |                    |                    |                      |
|-------------|---------------------------------------------------------------------------------------------------------------------------------------------------------------------------------------------|-----------|---------------------|----------------|---------------------------------------------------------------------------------------------------------------------------------------------------------------------------------------------|-----|----------------------|-------------------|--------------------|--------------------|----------------------|
|             | Diffuse Pontine Gliomas Previously Treated With External Beam Radiation Therapy                                                                                                             |           |                     |                | omburtamab<br>Radiation: External Beam Radiotherapy                                                                                                                                         |     |                      |                   |                    |                    |                      |
| NCT01514201 | Veliparib, Radiation Therapy, and Temozolomide in Treating Younger Patients With Newly Diagnosed Diffuse Pontine Gliomas                                                                    | Completed | Phase 1/<br>Phase 2 | Interventional | Drug: Temozolomide, Veliparib<br>Radiation: 3-Dimensional Conformal Radiation Therapy, Intensity-Modulated Radiation Therapy<br>Other: Laboratory Biomarker Analysis, Pharmacological Study | 66  | < 21 Years           | USA               | February 1, 2012   | March 28, 2018     | <a href="#">[17]</a> |
| NCT01635140 | Hypofractionated Radiotherapy Versus Conventional Radiotherapy in Diffuse Brainstem Glioma in Children                                                                                      | Completed | Phase 3             | Interventional | Radiation: Hypofractionated radiotherapy, Conventional arm                                                                                                                                  | 64  | 3 - 18 Years         | Egypt             | May 2010           | July 2011          | <a href="#">[18]</a> |
| NCT01644773 | Study of the Combination of Crizotinib and Dasatinib in Pediatric Research Participants With Diffuse Pontine Glioma (DIPG) and High-Grade Glioma (HGG)                                      | Completed | Phase 1             | Interventional | Drug: Crizotinib, Dasatinib                                                                                                                                                                 | 36  | 2 - 21 Years         | USA               | November 27, 2012  | September 28, 2018 | <a href="#">[19]</a> |
| NCT01688401 | Intra-arterial Chemotherapy for the Treatment of Progressive Diffuse Intrinsic Pontine Gliomas (DIPG).                                                                                      | Completed | Phase 1             | Interventional | Drug: Melphalan hydrochloride                                                                                                                                                               | 3   | 1 Month - 17 Years   | USA               | March 8, 2013      | November 26, 2018  | N/A                  |
| NCT01777633 | Palliative Re-irradiation for Progressive Diffuse Intrinsic Pontine Glioma (DIPG) in Children                                                                                               | Completed | Phase 1/<br>Phase 2 | Interventional | Radiation: Palliative re-irradiation for progressive DIPG in children                                                                                                                       | 15  | 1 Year - 22 Years    | Israel            | February 2013      | February 2015      | N/A                  |
| NCT01878266 | Prospective Trial of Two Hypofractionated Radiotherapy Regimens Versus Conventional Radiotherapy in Diffuse Brainstem Glioma in Children                                                    | Completed | -                   | Interventional | Radiation: Hypofractionated Arm, Conventional Arm                                                                                                                                           | 119 | 2 - 18 Years         | Egypt             | February 2013      | May 2016           | <a href="#">[20]</a> |
| NCT01922076 | Adavosertib and Local Radiation Therapy in Treating Children With Newly Diagnosed Diffuse Intrinsic Pontine Gliomas                                                                         | Completed | Phase 1             | Interventional | Drug: Adavosertib<br>Radiation: Radiation Therapy<br>Other: Laboratory Biomarker Analysis, Pharmacological Study                                                                            | 46  | 37 Months - 21 Years | USA               | September 3, 2013  | September 30, 2022 | N/A                  |
| NCT02151227 | Magnesium and Metabolic Syndrome: A Dose-response Meta-analysis                                                                                                                             | Completed | -                   | Observational  | -                                                                                                                                                                                           | 12  | 18 - 90 Years        | Republic of Korea | June 2014          | December 2014      | <a href="#">[21]</a> |
| NCT02274987 | Molecular Profiling for Individualized Treatment Plan for DIPG                                                                                                                              | Completed | -                   | Interventional | Radiation: Standard radiation therapy                                                                                                                                                       | 38  | < 25 Years           | USA               | September 16, 2014 | February 24, 2019  |                      |
| NCT02343406 | Adult Study: ABT-414 Alone or ABT-414 Plus Temozolomide vs. Lomustine or Temozolomide for Recurrent Glioblastoma Pediatric Study: Evaluation of ABT-414 in Children With High Grade Gliomas | Completed | Phase 2             | Interventional | Drug: Depatuxizumab<br>mafodotin, Temozolomide, Lomustine                                                                                                                                   | 266 | < 99 Years           | USA               | February 17, 2015  | June 24, 2019      | <a href="#">[22]</a> |
| NCT02444546 | Wild-Type Reovirus in Combination With Sargramostim in Treating Younger Patients With                                                                                                       | Completed | Phase 1             | Interventional | Biological: Sargramostim, Wild-type Reovirus                                                                                                                                                | 6   | 10 - 21 Years        | USA               | June 21, 2015      | November 21, 2022  | <a href="#">[23]</a> |

|             |                                                                                                                                                                                                  |                         |                 |                                               |                                                                                              |     |                      |       |                   |                   |                      |
|-------------|--------------------------------------------------------------------------------------------------------------------------------------------------------------------------------------------------|-------------------------|-----------------|-----------------------------------------------|----------------------------------------------------------------------------------------------|-----|----------------------|-------|-------------------|-------------------|----------------------|
|             | High-Grade Relapsed or Refractory Brain Tumors                                                                                                                                                   |                         |                 |                                               | Other: Laboratory Biomarker Analysis                                                         |     |                      |       |                   |                   |                      |
| NCT02502708 | Study of the IDO Pathway Inhibitor, Indoximod, and Temozolomide for Pediatric Patients With Progressive Primary Malignant Brain Tumors                                                           | Completed               | Phase 1         | Interventional                                | Drug: Indoximod, Temozolomide, Cyclophosphamide, Etoposide<br>Radiation: Conformal Radiation | 81  | 3 - 21 Years         | USA   | October 2015      | February 28, 2020 | <a href="#">[24]</a> |
| NCT02644291 | Phase I Study of Mebendazole Therapy for Recurrent/Progressive Pediatric Brain Tumors                                                                                                            | Completed               | Phase 1         | Interventional                                | Drug: Mebendazole                                                                            | 16  | 1 Year - 21 Years    | USA   | May 2016          | June 9, 2022      | N/A                  |
| NCT02750891 | A Study of DSP-7888 in Pediatric Patients With Relapsed or Refractory High Grade Gliomas                                                                                                         | Completed               | Phase 1/Phase 2 | Interventional                                | Drug: DSP-7888                                                                               | 18  | < 19 Years           | Japan | April 2016        | January 2020      | N/A                  |
| NCT03086616 | CED With Irinotecan Liposome Injection Using Real Time Imaging in Children With Diffuse Intrinsic Pontine Glioma (DIPG) (PNOC 009)                                                               | Completed               | Phase 1         | Interventional                                | Drug: Convection Enhanced Delivery (CED) of Nanoliposomal irinotecan (nal-IRI)               | 6   | 2 Years and older    | USA   | October 31, 2017  | October 4, 2021   | N/A                  |
| NCT03178032 | Oncolytic Adenovirus, DNX-2401, for Naive Diffuse Intrinsic Pontine Gliomas                                                                                                                      | Completed               | Phase 1         | Interventional                                | Biological: DNX-2401                                                                         | 12  | 1 Year - 18 Years    | Spain | May 26, 2017      | January 31, 2021  | <a href="#">[25]</a> |
| NCT03355794 | A Study of Ribociclib and Everolimus Following Radiation Therapy in Children With Newly Diagnosed Non-biopsied Diffuse Pontine Gliomas (DIPG) and RB+ Biopsied DIPG and High Grade Gliomas (HGG) | Completed               | Phase 1         | Interventional                                | Drug: Ribociclib, Everolimus                                                                 | 19  | 12 Months - 30 Years | USA   | November 14, 2017 | July 31, 2022     | N/A                  |
| NCT03387020 | Ribociclib and Everolimus in Treating Children With Recurrent or Refractory Malignant Brain Tumors                                                                                               | Completed               | Phase 1         | Interventional                                | Drug: Everolimus, Ribociclib<br>Other: Laboratory Biomarker Analysis, Pharmacological Study  | 22  | 1 Year - 21 Years    | USA   | January 13, 2018  | April 1, 2020     | N/A                  |
| NCT03566199 | MTX110 by Convection-Enhanced Delivery in Treating Participants With Newly-Diagnosed Diffuse Intrinsic Pontine Glioma                                                                            | Completed               | Phase 1/Phase 2 | Interventional                                | Drug: Panobinostat Nanoparticle Formulation MTX110, Convection-Enhanced Delivery (CED)       | 7   | 2 - 21 Years         | USA   | May 22, 2018      | March 31, 2021    | N/A                  |
| NCT03696355 | Study of GDC-0084 in Pediatric Patients With Newly Diagnosed Diffuse Intrinsic Pontine Glioma or Diffuse Midline Gliomas                                                                         | Completed               | Phase 1         | Interventional                                | Drug: GDC-0084<br>Radiation: radiation therapy                                               | 27  | 2 - 21 Years         | USA   | November 19, 2018 | September 4, 2022 | N/A                  |
| NCT03841435 | Hypofractionated Radiotherapy for Recurrent DIPG                                                                                                                                                 | Enrolling by invitation | -               | Interventional                                | Radiation: Hypofractionated Radiotherapy                                                     | 6   | < 30 Years           | USA   | January 31, 2018  | July 31, 2023     | N/A                  |
| NCT05392374 | Expanded Access Use of ONC201 in a Patient With Diffuse Intrinsic Pontine Gliomas                                                                                                                | No longer available     | -               | Expanded Access: Intermediate-size Population | Drug: ONC201                                                                                 | -   | 6 Months - 18 Years  | USA   | -                 | -                 | N/A                  |
| NCT05063357 | 131I-omburtamab Delivered by Convection-Enhanced Delivery in Patients With Diffuse Intrinsic Pontine Glioma                                                                                      | Not yet recruiting      | Phase 1         | Interventional                                | Drug: 131I-Omburtamab<br>Device: Convection Enhanced Delivery                                | 36  | 3 - 21 Years         | -     | March 2023        | January 31, 2027  | N/A                  |
| NCT05096481 | PEP-CMV Vaccine Targeting CMV Antigen to Treat Newly Diagnosed Pediatric HGG and DIPG and Recurrent Medulloblastoma                                                                              | Not yet recruiting      | Phase 2         | Interventional                                | Drug: Temozolomide<br>Biological: Tetanus Diphtheria Vaccine, PEP-CMV                        | 120 | 3 - 25 Years         | USA   | May 15, 2023      | May 15, 2029      | N/A                  |

|             |                                                                                                                                                                                                                                 |                    |                 |                |                                                                                                                                                                                                                                                                                                             |       |                      |     |                    |                   |     |
|-------------|---------------------------------------------------------------------------------------------------------------------------------------------------------------------------------------------------------------------------------|--------------------|-----------------|----------------|-------------------------------------------------------------------------------------------------------------------------------------------------------------------------------------------------------------------------------------------------------------------------------------------------------------|-------|----------------------|-----|--------------------|-------------------|-----|
| NCT05298995 | GD2-CAR T Cells for Pediatric Brain Tumours                                                                                                                                                                                     | Not yet recruiting | Phase 1         | Interventional | Biological: GD2-CART01 (iC9-GD2-CAR T-cells)                                                                                                                                                                                                                                                                | 54    | 6 Months - 30 Years  | -   | May 2022           | May 2037          | N/A |
| NCT05478837 | Genetically Modified Cells (KIND T Cells) for the Treatment of HLA-A*0201-Positive Patients With H3.3K27M-Mutated Glioma                                                                                                        | Not yet recruiting | Phase 1         | Interventional | Drug: Cyclophosphamide   Drug: Fludarabine   Biological: Autologous Anti-H3.3K27M TCR-expressing T-cells                                                                                                                                                                                                    | 12    | 3 - 21 Years         | USA | May 30, 2023       | December 31, 2028 | N/A |
| NCT05544526 | CAR T Cells to Target GD2 for DMG                                                                                                                                                                                               | Not yet recruiting | Phase 1         | Interventional | Biological: GD2 CAR T cells                                                                                                                                                                                                                                                                                 | 12    | < 16 Years           | -   | May 30, 2023       | December 2039     | N/A |
| NCT05768880 | Study of B7-H3, EGFR806, HER2, And IL13-Zetakine (Quad) CAR T Cell Locoregional Immunotherapy For Pediatric Diffuse Intrinsic Pontine Glioma, Diffuse Midline Glioma, And Recurrent Or Refractory Central Nervous System Tumors | Not yet recruiting | Phase 1         | Interventional | Biological: SC-CAR4BRAIN                                                                                                                                                                                                                                                                                    | 72    | 1 Year - 26 Years    | USA | April 25, 2023     | December 31, 2043 | N/A |
| NCT05839379 | Targeted Pediatric High-Grade Glioma Therapy                                                                                                                                                                                    | Not yet recruiting | -               | Observational  | -                                                                                                                                                                                                                                                                                                           | 450   | 12 Months - 30 Years | USA | August 15, 2023    | August 15, 2033   | N/A |
| NCT05843253 | Study of Ribociclib and Everolimus in HGG and DIPG                                                                                                                                                                              | Not yet recruiting | Phase 2         | Interventional | Drug: Ribociclib, Everolimus                                                                                                                                                                                                                                                                                | 100   | 12 Months - 30 Years | USA | August 15, 2023    | August 15, 2033   | N/A |
| NCT01106794 | Molecular Analysis of Samples From Patients With Diffuse Intrinsic Pontine Glioma and Brainstem Glioma                                                                                                                          | Recruiting         | -               | Observational  | -                                                                                                                                                                                                                                                                                                           | 100   | < 21 Years           | USA | April 2010         | April 2030        | N/A |
| NCT01793168 | Rare Disease Patient Registry & Natural History Study - Coordination of Rare Diseases at Sanford                                                                                                                                | Recruiting         | -               | Observational  | -                                                                                                                                                                                                                                                                                                           | 20000 | -                    | USA | July 2010          | December 2100     | N/A |
| NCT01837862 | A Phase I Study of Mebendazole for the Treatment of Pediatric Gliomas                                                                                                                                                           | Recruiting         | Phase 1/Phase 2 | Interventional | Drug: Mebendazole, Vincristine, Carboplatin, Temozolomide, Bevacizumab Irinotecan                                                                                                                                                                                                                           | 36    | 1 Year - 21 Years    | USA | October 22, 2013   | April 2025        | N/A |
| NCT02359565 | Pembrolizumab in Treating Younger Patients With Recurrent, Progressive, or Refractory High-Grade Gliomas, Diffuse Intrinsic Pontine Gliomas, Hypermutated Brain Tumors, Ependymoma or Medulloblastoma                           | Recruiting         | Phase 1         | Interventional | Biological: Pembrolizumab<br>Procedure: Biospecimen Collection, Conventional Magnetic Resonance Imaging, Diffusion Tensor Imaging, Diffusion Weighted Imaging, Dynamic Contrast-enhanced MR Perfusion, Dynamic Susceptibility Contrast-Perfusion-Weighted Imaging, Magnetic Resonance Spectroscopic Imaging | 110   | 1 Year - 30 Years    | USA | May 22, 2015       | December 31, 2026 | N/A |
| NCT02644460 | Abemaciclib in Children With DIPG or Recurrent/Refractory Solid Tumors                                                                                                                                                          | Recruiting         | Phase 1         | Interventional | Drug: Abemaciclib                                                                                                                                                                                                                                                                                           | 60    | 2 - 25 Years         | USA | February 2016      | December 2024     | N/A |
| NCT02992015 | Gemcitabine in Newly-Diagnosed Diffuse Intrinsic Pontine Glioma                                                                                                                                                                 | Recruiting         | Early Phase 1   | Interventional | Drug: Gemcitabine                                                                                                                                                                                                                                                                                           | 10    | 3 - 17 Years         | USA | September 23, 2016 | December 2025     | N/A |

|             |                                                                                                                                                                                                                                            |            |                 |                |                                                                                                                                                                                                         |      |                      |                                |                    |                   |                      |
|-------------|--------------------------------------------------------------------------------------------------------------------------------------------------------------------------------------------------------------------------------------------|------------|-----------------|----------------|---------------------------------------------------------------------------------------------------------------------------------------------------------------------------------------------------------|------|----------------------|--------------------------------|--------------------|-------------------|----------------------|
| NCT03101813 | International Diffuse Intrinsic Pontine Glioma (DIPG)/Diffuse Midline Glioma (DMG) Registry and Repository                                                                                                                                 | Recruiting | -               | Observational  | -                                                                                                                                                                                                       | 1500 | -                    | USA                            | June 2012          | June 2047         | N/A                  |
| NCT03126266 | Re-Irradiation of Progressive or Recurrent DIPG                                                                                                                                                                                            | Recruiting | -               | Interventional | Radiation: re-irradiation                                                                                                                                                                               | 27   | -                    | Australia, Canada, New Zealand | April 15, 2017     | December 2024     | N/A                  |
| NCT03243461 | International Cooperative Phase III Trial of the HIT-HGG Study Group (HIT-HGG-2013)                                                                                                                                                        | Recruiting | Phase 3         | Interventional | Drug: Temozolomide, Valproic Acid                                                                                                                                                                       | 167  | 3 - 17 Years         | Germany                        | July 17, 2018      | December 31, 2023 | N/A                  |
| NCT03396575 | Brain Stem Gliomas Treated With Adoptive Cellular Therapy During Focal Radiotherapy Recovery Alone or With Dose-intensified Temozolomide (Phase I)                                                                                         | Recruiting | Phase 1         | Interventional | Drug: Cyclophosphamide + Fludarabine Lymphodepletive Conditioning, Dose-Intensified TMZ, Td vaccine<br>Biological: TTRNA-DC vaccines with GM-CSF, TTRNA-xALT, Autologous Hematopoietic Stem Cells (HSC) | 21   | 3 - 30 Years         | USA                            | May 17, 2018       | June 2025         | N/A                  |
| NCT03598244 | Volitinib in Treating Patients With Recurrent or Refractory Primary CNS Tumors                                                                                                                                                             | Recruiting | Phase 1         | Interventional | Drug: Savolitinib                                                                                                                                                                                       | 50   | 6 - 21 Years         | USA                            | October 15, 2018   | January 31, 2025  | N/A                  |
| NCT03605550 | A Phase 1b Study of PTC596 in Children With Newly Diagnosed Diffuse Intrinsic Pontine Glioma and High Grade Glioma                                                                                                                         | Recruiting | Phase 1         | Interventional | Drug: PTC596<br>Radiation: Radiotherapy                                                                                                                                                                 | 64   | 12 Months - 21 Years | USA                            | August 1, 2018     | July 1, 2028      | N/A                  |
| NCT03690869 | REGN2810 in Pediatric Patients With Relapsed, Refractory Solid, or Central Nervous System (CNS) Tumors and Safety and Efficacy of REGN2810 in Combination With Radiotherapy in Pediatric Patients With Newly Diagnosed or Recurrent Glioma | Recruiting | Phase 1/Phase 2 | Interventional | Drug: cemiplimab (monotherapy), cemiplimab (maintenance)<br>Radiation: Conventional or hypofractionated, Re-irradiation                                                                                 | 130  | < 25 Years           | USA                            | September 24, 2018 | November 20, 2024 | N/A                  |
| NCT03709680 | Study Of Palbociclib Combined With Chemotherapy In Pediatric Patients With Recurrent/Refractory Solid Tumors                                                                                                                               | Recruiting | Phase 1/Phase 2 | Interventional | Drug: Palbociclib, Temozolomide, Irinotecan, Topotecan, Cyclophosphamide                                                                                                                                | 184  | 2 - 20 Years         | USA                            | May 24, 2019       | March 15, 2025    | <a href="#">[26]</a> |
| NCT04049669 | Pediatric Trial of Indoximod With Chemotherapy and Radiation for Relapsed Brain Tumors or Newly Diagnosed DIPG                                                                                                                             | Recruiting | Phase 2         | Interventional | Drug: Indoximod, Temozolomide, Cyclophosphamide<br>Etoposide, Lomustine<br>Radiation: Partial Radiation, Full-dose Radiation                                                                            | 140  | 3 - 21 Years         | USA                            | October 2, 2019    | October 2, 2027   | N/A                  |
| NCT04099797 | C7R-GD2.CAR T Cells for Patients With GD2-expressing Brain Tumors (GAIL-B)                                                                                                                                                                 | Recruiting | Phase 1         | Interventional | Genetic: (C7R)-GD2.CART cells                                                                                                                                                                           | 34   | 12 Months - 21 Years | USA                            | February 3, 2020   | February 2039     | N/A                  |
| NCT04185038 | Study of B7-H3-Specific CAR T Cell Locoregional Immunotherapy for Diffuse Intrinsic Pontine Glioma/Diffuse Midline Glioma and                                                                                                              | Recruiting | Phase 1         | Interventional | Biological: SCRI-CARB7H3(s); B7H3-specific chimeric antigen receptor (CAR) T cel                                                                                                                        | 90   | 1 Year - 26 Years    | USA                            | December 11, 2019  | May 2041          | N/A                  |



|             |                                                                                                                                                                                                |            |                 |                |                                                                                                                        |     |                   |         |                   |                   |                      |
|-------------|------------------------------------------------------------------------------------------------------------------------------------------------------------------------------------------------|------------|-----------------|----------------|------------------------------------------------------------------------------------------------------------------------|-----|-------------------|---------|-------------------|-------------------|----------------------|
|             | Recurrent or Refractory Pediatric Central Nervous System Tumors                                                                                                                                |            |                 |                |                                                                                                                        |     |                   |         |                   |                   |                      |
| NCT04196413 | GD2 CAR T Cells in Diffuse Intrinsic Pontine Gliomas(DIPG) & Spinal Diffuse Midline Glioma(DMG)                                                                                                | Recruiting | Phase 1         | Interventional | Drug: GD2 CAR T cells, Fludarabine, Cyclophosphamide                                                                   | 54  | 2 - 30 Years      | USA     | June 4, 2020      | July 31, 2042     | <a href="#">[27]</a> |
| NCT04238819 | A Study of Abemaciclib (LY2835219) in Combination With Other Anti-Cancer Treatments in Children and Young Adult Participants With Solid Tumors, Including Neuroblastoma                        | Recruiting | Phase 1/Phase 2 | Interventional | Drug: Abemaciclib, Irinotecan, Temozolomide, Dinutuximab, GM-CSF                                                       | 117 | < 21 Years        | USA     | November 9, 2020  | December 21, 2028 | <a href="#">[28]</a> |
| NCT04250064 | A Study of Low Dose Bevacizumab With Conventional Radiotherapy Alone in Diffuse Intrinsic Pontine Glioma                                                                                       | Recruiting | Phase 2         | Interventional | Drug: Bevacizumab Injection<br>Radiation: Ultra-low-dose RT                                                            | 40  | 3 - 18 Years      | India   | February 4, 2020  | February 2023     | N/A                  |
| NCT04264143 | CED of MTX110 Newly Diagnosed Diffuse Midline Gliomas                                                                                                                                          | Recruiting | Phase 1         | Interventional | Drug: Infusate with MTX110 and gadolinium<br>Device: Convection-Enhanced Delivery (CED)                                | 9   | 3 - 18 Years      | USA     | March 10, 2020    | February 2024     | N/A                  |
| NCT04541082 | Phase I Study of Oral ONC206 in Recurrent and Rare Primary Central Nervous System Neoplasms                                                                                                    | Recruiting | Phase 1         | Interventional | Drug: ONC206                                                                                                           | 102 | ≥ 18 Years        | USA     | October 26, 2020  | February 2025     | <a href="#">[29]</a> |
| NCT04655404 | A Pilot Study of Larotrectinib for Newly-Diagnosed High-Grade Glioma With NTRK Fusion                                                                                                          | Recruiting | Early Phase 1   | Interventional | Drug: Larotrectinib<br>Procedure: Larotrectinib surgical                                                               | 15  | < 21 Years        | USA     | April 8, 2021     | December 1, 2025  | N/A                  |
| NCT04670016 | HRQL and Symptom Assessment for Patients With DIPG or Recurrent and Re-irradiated Brain Tumours and Their Caregivers                                                                           | Recruiting | -               | Observational  | -                                                                                                                      | 57  | 2 - 21 Years      | Canada  | July 2, 2020      | December 2023     | N/A                  |
| NCT04732065 | ONC206 for Treatment of Newly Diagnosed, or Recurrent Diffuse Midline Gliomas, and Other Recurrent Malignant CNS Tumors (PNOC 023)                                                             | Recruiting | Phase 1         | Interventional | Drug: ONC206<br>Radiation: Standard of Care Radiation Therapy                                                          | 256 | 2 - 21 Years      | USA     | August 23, 2021   | December 31, 2025 | N/A                  |
| NCT04749641 | Neoantigen Vaccine Therapy Against H3.3-K27M Diffuse Intrinsic Pontine Glioma                                                                                                                  | Recruiting | Phase 1         | Interventional | Biological: Histone H3.3-K27M Neoantigen Vaccine Therapy                                                               | 30  | ≥ 5 Years         | China   | March 8, 2021     | April 1, 2024     | <a href="#">[30]</a> |
| NCT04758533 | Clinical Trial to Assess the Safety and Efficacy of AlocELYVIR With Newly Diagnosed Diffuse Intrinsic Pontine Glioma (DIPG) in Combination With Radiotherapy or Medulloblastoma in Monotherapy | Recruiting | Phase 1/Phase 2 | Interventional | Biological: AlocELYVIR                                                                                                 | 12  | 1 Year - 21 Years | Spain   | April 19, 2021    | October 2024      | N/A                  |
| NCT04771897 | A Study of BXQ-350 in Children With Newly Diagnosed Diffuse Intrinsic Pontine Glioma (DIPG) or Diffuse Midline Glioma (DMG)                                                                    | Recruiting | Phase 1         | Interventional | Drug: BXQ-350 - Part 1 Dose Escalation: Safety and Tolerance, BXQ-350 - Part 2 BXQ-350 Tumor and Plasma Concentrations | 22  | 1 Year - 30 Years | USA     | May 24, 2021      | December 2024     | N/A                  |
| NCT04808245 | A MultICeNTER Phase I Peptide VaCcine Trial for the Treatment of H3-Mutated Gliomas                                                                                                            | Recruiting | Phase 1         | Interventional | Drug: Tecentriq 1200 MG in 20 ML Injection<br>Biological: H3K27M peptide vaccine<br>Other: Imiquimod (5%)              | 15  | ≥ 18 Years        | Germany | February 15, 2023 | March 2025        | N/A                  |



|             |                                                                                                                                                                  |            |                 |                |                                                                                                                                                   |      |                      |        |                    |                   |                      |
|-------------|------------------------------------------------------------------------------------------------------------------------------------------------------------------|------------|-----------------|----------------|---------------------------------------------------------------------------------------------------------------------------------------------------|------|----------------------|--------|--------------------|-------------------|----------------------|
| NCT04837547 | PEACH TRIAL- Precision Medicine and Adoptive Cellular Therapy                                                                                                    | Recruiting | Phase 1         | Interventional | Biological: Tumor-specific ex vivo expanded autologous lymphocyte transfer (TTRNA-xALT)                                                           | 24   | 1 Year - 30 Years    | USA    | September 20, 2021 | September 2030    | N/A                  |
| NCT04908176 | A Drug-drug Interaction Study of Avapritinib and Midazolam                                                                                                       | Recruiting | Phase 1         | Interventional | Drug: Avapritinib, Midazolam                                                                                                                      | 20   | 18 Years and older   | USA    | August 24, 2022    | December 31, 2023 | N/A                  |
| NCT04943848 | rHSC-DIPGVax Plus Checkpoint Blockade for the Treatment of Newly Diagnosed DIPG and DMG                                                                          | Recruiting | Phase 1         | Interventional | Biological: rHSC-DIPGVax<br>Drug: Balstilimab, Zalifrelimab                                                                                       | 36   | 12 Months - 18 Years | USA    | January 10, 2022   | March 2025        | N/A                  |
| NCT04978727 | A Pilot Study of SurVaxM in Children Progressive or Relapsed Medulloblastoma, High Grade Glioma, Ependymoma and Newly Diagnosed Diffuse Intrinsic Pontine Glioma | Recruiting | Phase 1         | Interventional | Biological: SurVaxM for patients with non-relapsed DIPG post radiation-therapy ages $\geq 1$ and $\leq 21$ years                                  | 35   | 1 Year - 21 Years    | USA    | July 1, 2022       | June 30, 2028     | N/A                  |
| NCT05009992 | Combination Therapy for the Treatment of Diffuse Midline Gliomas                                                                                                 | Recruiting | Phase 2         | Interventional | Drug: ONC201, Paxalisib<br>Radiation: Radiation Therapy                                                                                           | 324  | 2 - 39 Years         | USA    | October 20, 2021   | June 30, 2027     | N/A                  |
| NCT05077735 | Stereotactic Biopsy Split-Course Radiation Therapy in Diffuse Midline Glioma, SPORT-DMG Study                                                                    | Recruiting | Phase 2         | Interventional | Radiation: Hypofractionated Radiation Therapy<br>Other: Quality-of-Life Assessment, Questionnaire Administration                                  | 18   | $\geq 1$ Year        | USA    | October 6, 2021    | October 15, 2025  | N/A                  |
| NCT05099003 | A Study of the Drug Selinexor With Radiation Therapy in Patients With Newly-Diagnosed Diffuse Intrinsic Pontine (DIPG) Glioma and High-Grade Glioma (HGG)        | Recruiting | Phase 1/Phase 2 | Interventional | Drug: Selinexor<br>Procedure: Biopsy, Magnetic Resonance Imaging<br>Radiation: Radiation Therapy                                                  | 210  | 12 Months - 21 Years | USA    | May 5, 2022        | June 30, 2024     | N/A                  |
| NCT05123534 | A Phase 1/2 Study of Sonodynamic Therapy Using SONALA-001 and Exablate 4000 Type 2 in Patients With DIPG                                                         | Recruiting | Phase 1/Phase 2 | Interventional | Combination Product: SONALA-001 (ALA) and MR-Guided Focused Ultrasound device (MRgFUS)                                                            | 27   | $\geq 5$ Years       | USA    | August 12, 2022    | August 12, 2025   | <a href="#">[31]</a> |
| NCT05259605 | Observational Study for Assessing Treatment and Outcome of Patients With Primary Brain Tumours Using cIMPACT-NOW and 2021 WHO Classification                     | Recruiting | -               | Observational  | -                                                                                                                                                 | 1250 | $\geq 18$ Years      | Spain  | March 28, 2023     | December 15, 2026 | N/A                  |
| NCT05278208 | Lutathera for Treatment of Recurrent or Progressive High-Grade CNS Tumors or Meningiomas Expressing SST2A                                                        | Recruiting | Phase 1/Phase 2 | Interventional | Drug: LUTATHERA® (Lutetium Lu 177 dotatate)                                                                                                       | 65   | $\geq 4$ Years       | USA    | November 21, 2022  | November 2027     | N/A                  |
| NCT05413304 | Abemaciclib Neuropharmacokinetics of Diffuse Midline Glioma Using Intratumoral Microdialysis                                                                     | Recruiting | Phase 1         | Interventional | Drug: pre-operative abemaciclib, abemaciclib + temozolomide<br>Device: Device for Cerebral Fluid Dialysate Collection, Ashion Analytics GEM ExTra | 7    | 18 - 39 Years        | USA    | April 7, 2023      | August 31, 2024   | N/A                  |
| NCT05476939 | Biological Medicine for Diffuse Intrinsic Pontine Glioma (DIPG) Eradication 2.0                                                                                  | Recruiting | Phase 3         | Interventional | Drug: Everolimus, ONC201<br>Radiation: Radiotherapy                                                                                               | 368  | $\geq 6$ Months      | France | September 29, 2022 | September 2031    | N/A                  |

|             |                                                                                                                                                        |            |                 |                |                                                                                                       |     |                      |         |                   |                 |     |
|-------------|--------------------------------------------------------------------------------------------------------------------------------------------------------|------------|-----------------|----------------|-------------------------------------------------------------------------------------------------------|-----|----------------------|---------|-------------------|-----------------|-----|
| NCT05500508 | Oral AMXT 1501 Dicaprate in Combination With IV DFMO                                                                                                   | Recruiting | Phase 1/Phase 2 | Interventional | Drug: AMXT1501, DFMO                                                                                  | 56  | ≥ 12 Years           | USA     | November 29, 2022 | March 31, 2024  | N/A |
| NCT05580562 | ONC201 in H3 K27M-mutant Diffuse Glioma Following Radiotherapy (the ACTION Study)                                                                      | Recruiting | Phase 3         | Interventional | Drug: ONC201, ONC201 + Placebo<br>Other: Placebo                                                      | 450 | -                    | USA     | January 23, 2023  | August 2026     | N/A |
| NCT05630209 | Blood Brain Barrier (BBB) Disruption Using Exablate Focused Ultrasound With Doxorubicin for Treatment of Pediatric DIPG                                | Recruiting | Phase 1/Phase 2 | Interventional | Drug: Doxorubicin<br>Device: Exablate                                                                 | 10  | 5 - 21 Years         | USA     | February 2023     | January 2026    | N/A |
| NCT05717712 | Oncolytic Virus Ad-TD-nsIL12 for Primary Pediatric Diffuse Intrinsic Pontine Glioma                                                                    | Recruiting | Phase 1         | Interventional | Biological: Ad-TD-nsIL12                                                                              | 18  | 1 Year - 18 Years    | China   | January 4, 2023   | January 4, 2028 | N/A |
| NCT05762419 | FUS Etoposide for DMG - A Feasibility Study                                                                                                            | Recruiting | Phase 1         | Interventional | Drug: Etoposide; Oral, 50 Mg<br>Device: Focused ultrasound with neuro-navigator-controlled sonication | 10  | 4 - 21 Years         | USA     | March 2023        | January 2027    | N/A |
| NCT05835687 | Loc3CAR: Locoregional Delivery of B7-H3-CAR T Cells for Pediatric Patients With Primary CNS Tumors                                                     | Recruiting | Phase 1         | Interventional | Drug: B7-H3-CAR T cells                                                                               | 36  | < 21 Years           | USA     | April 25, 2023    | March 2028      | N/A |
| NCT02742883 | A Study of Atengenal and Astugenal in Diffuse, Intrinsic Pontine Glioma (DIPG)                                                                         | Suspended  | Phase 2         | Interventional | Drug: Antineoplaston therapy (Atengenal + Astugenal)                                                  | 1   | 3 Months - 99 Years  | USA     | April 13, 2016    | March 2028      | N/A |
| NCT01058850 | Phase I Rindopepimut After Conventional Radiation in Children w/ Diffuse Intrinsic Pontine Gliomas                                                     | Terminated | Phase 1         | Interventional | Biological: Rindopepimut                                                                              | 3   | 3 - 18 Years         | USA     | June 2011         | September 2013  | N/A |
| NCT01182350 | Molecularly Determined Treatment of Diffuse Intrinsic Pontine Gliomas (DIPG)                                                                           | Terminated | Phase 2         | Interventional | Drug: Bevacizumab, Erlotinib, Temozolomide<br>Radiation: Radiation                                    | 53  | 3 - 18 Years         | USA     | September 2011    | June 2016       | N/A |
| NCT01400672 | Imiquimod/Brain Tumor Initiating Cell (BTIC) Vaccine in Brain Stem Glioma                                                                              | Terminated | Phase 1         | Interventional | Drug: Imiquimod<br>Biological: Tumor Lysate Vaccine<br>Radiation: Radiation therapy                   | 8   | > 3 Years            | USA     | July 17, 2012     | October 8, 2018 | N/A |
| NCT01517776 | Cilengitide and Metronomic Temozolomide for Relapsed or Refractory High Grade Gliomas or Diffuse Intrinsic Pontine Gliomas in Children and Adolescents | Terminated | Phase 2         | Interventional | Drug: Cilengitide, Temozolomide                                                                       | 28  | 3 - 17 Years         | Germany | January 2012      | April 2014      | N/A |
| NCT01774253 | Erivedge (Vismodegib) in the Treatment of Pediatric Patients With Refractory Pontine Glioma                                                            | Terminated | Phase 2         | Interventional | Drug: Vismodegib                                                                                      | 9   | 3 - 18 Years         | USA     | May 2013          | October 2015    | N/A |
| NCT01836549 | Imetelstat Sodium in Treating Younger Patients With Recurrent or Refractory Brain Tumors                                                               | Terminated | Phase 2         | Interventional | Drug: imetelstat sodium                                                                               | 43  | 12 Months - 21 Years | USA     | March 2013        | April 2016      | N/A |

|             |                                                                                                                                                                      |                |                 |                |                                                                                                  |     |                      |        |                    |                    |                      |
|-------------|----------------------------------------------------------------------------------------------------------------------------------------------------------------------|----------------|-----------------|----------------|--------------------------------------------------------------------------------------------------|-----|----------------------|--------|--------------------|--------------------|----------------------|
| NCT01884740 | Intraarterial Infusion Of Erbitux and Bevacizumab For Relapsed/Refractory Intracranial Glioma In Patients Under 22                                                   | Terminated     | Phase 1/Phase 2 | Interventional | Drug: SIACI of Erbitux and Bevacizumab                                                           | 13  | 1 Year - 21 Years    | USA    | June 2013          | October 2018       | <a href="#">[32]</a> |
| NCT02607124 | A Phase I/II Study of Ribociclib,a CDK4/6 Inhibitor, Following Radiation Therapy                                                                                     | Terminated     | Phase 1/Phase 2 | Interventional | Drug: Ribociclib                                                                                 | 11  | 12 Months - 30 Years | USA    | April 2016         | August 2018        | N/A                  |
| NCT02758366 | Prolonged Exposure to Doxorubicin in Patients With Glioblastoma Multiforme and Diffuse Intrinsic Pontine Glioma                                                      | Terminated     | Phase 2         | Interventional | Drug: Doxorubicin                                                                                | 21  | 3 - 30 Years         | Italy  | February 2016      | January 16, 2020   | N/A                  |
| NCT03330197 | A Study of Ad-RTS-hIL-12 + Veledimex in Pediatric Subjects With Brain Tumors Including DIPG                                                                          | Terminated     | Phase 1/Phase 2 | Interventional | Drug: Oral Veledimex - Arm 2 (DIPG)<br>Biological: Ad-RTS-hIL-12                                 | 6   | 0 - 21 Years         | USA    | September 26, 2017 | September 10, 2021 | N/A                  |
| NCT03967093 | A Study of BXQ-350 in Children and Young Adults With Relapsed Solid Tumors                                                                                           | Terminated     | Phase 1         | Interventional | Drug: BXQ-350                                                                                    | 9   | 1 Year - 30 Years    | USA    | April 15, 2019     | January 17, 2020   | <a href="#">[33]</a> |
| NCT04730349 | A Study of Bempegaldesleukin (BEMPEG: NKTR-214) in Combination With Nivolumab in Children, Adolescents and Young Adults With Recurrent or Treatment-resistant Cancer | Terminated     | Phase 1/Phase 2 | Interventional | Biological: Nivolumab, NKTR-214                                                                  | 15  | < 30 Years           | USA    | June 3, 2021       | June 22, 2022      | N/A                  |
| NCT00278278 | Combination Chemotherapy and Radiation Therapy With or Without Methotrexate in Treating Young Patients With Newly Diagnosed Gliomas                                  | Unknown status | Phase 3         | Interventional | Drug: Cisplatin, Etoposide, Ifosfamide, Lomustine, Methotrexate, Prednisone, Vincristine sulfate | 150 | 3 - 18 Years         | USA    | September 2003     | -                  | N/A                  |
| NCT01952769 | Anti PD1 Antibody in Diffuse Intrinsic Pontine Glioma                                                                                                                | Unknown status | Phase 1/Phase 2 | Interventional | Biological: MDV9300                                                                              | 50  | 3 - 21 Years         | Israel | February 2014      | April 2019         | N/A                  |
| NCT02233049 | Biological Medicine for Diffuse Intrinsic Pontine Glioma (DIPG) Eradication                                                                                          | Unknown status | Phase 2         | Interventional | Drug: Erlotinib, Everolimus, Dasatinib                                                           | 250 | 6 Months - 25 Years  | France | October 2014       | October 2018       | N/A                  |
| NCT02840123 | Safety Study of DIPG Treatment With Autologous Dendritic Cells Pulsed With Lysated ALlegenic Tumor Lines                                                             | Unknown status | Phase 1         | Interventional | Biological: Autologous dendritic cells                                                           | 10  | 3 - 18 Years         | Spain  | June 2016          | March 2019         | N/A                  |
| NCT03914768 | Immune Modulatory DC Vaccine Against Brain Tumor                                                                                                                     | Unknown status | Phase 1         | Interventional | Biological: Immunomodulatory DC vaccine to target DIPG and GBM                                   | 10  | 1 Year - 75 Years    | China  | March 31, 2019     | December 31, 2022  | N/A                  |
| NCT04532229 | Nimotuzumab in Combined With Concurrent Radiochemotherapy in the Treatment of Newly Diagnosed Diffuse Intrinsic Pontine Glioma (DIPG) in Children                    | Unknown status | Phase 3         | Interventional | Drug: Nimotuzumab+CRT(concurrent IMRT and TMZ)                                                   | 48  | 3 - 15 Years         | China  | April 3, 2021      | December 8, 2022   | N/A                  |
| NCT03632317 | A Study of Panobinostat in Combination With Everolimus for Children and Young Adults With Gliomas                                                                    | Withdrawn      | Phase 2         | Interventional | Drug: Panobinostat, Everolimus                                                                   | 0   | 2 - 30 Years         | USA    | October 2019       | October 2025       | N/A                  |

|             |                                                       |           |               |                |                                                             |   |              |     |                   |               |     |
|-------------|-------------------------------------------------------|-----------|---------------|----------------|-------------------------------------------------------------|---|--------------|-----|-------------------|---------------|-----|
| NCT04051047 | Gemcitabine in Newly-Diagnosed Diffuse Midline Glioma | Withdrawn | Early Phase 1 | Interventional | Drug: Gemcitabine<br>Procedure: Tumor biopsy and blood draw | 0 | 3 - 17 Years | USA | November 30, 2019 | December 2021 | N/A |
|-------------|-------------------------------------------------------|-----------|---------------|----------------|-------------------------------------------------------------|---|--------------|-----|-------------------|---------------|-----|

## References

1. In Proceedings of the Khatua, S.; Chandra, J.; Gopalakrishnan, V.; Ketonen, L.; Johnson, M.; Sandberg, D.; Fuller, G.; Morrell, M.; Meador, H.; Bolton, K.; et al. *Pdct-16. A Phase I Study of Suberoylanilide Hydroxamic Acid (Saha) with Temsirolimus in Children with Newly Diagnosed or Progressive Diffuse Intrinsic Pontine Glioma (Dipg)*; Neuro Oncol. 2019 Nov;21(Suppl 6):vi186-7. doi: 10.1093/neuonc/noz175.776. Epub 2019 Nov 11.
2. Arrillaga-Romany, I.; Kurz, S.C.; Tarapore, R.; Sumrall, A.; Butowski, N.A.; Harrison, R.A.; Groot, J.F.D.; Chi, A.S.; Shonka, N.A.; Umemura, Y.; et al. Single-agent ONC201 in recurrent H3 K27M-mutant diffuse midline glioma. **2020**, 38, 3615-3615, doi:10.1200/JCO.2020.38.15\_suppl.3615.
3. Mueller, S.; Taitt, J.M.; Villanueva-Meyer, J.E.; Bonner, E.R.; Nejo, T.; Lulla, R.R.; Goldman, S.; Banerjee, A.; Chi, S.N.; Whipple, N.S.; et al. Mass cytometry detects H3.3K27M-specific vaccine responses in diffuse midline glioma. *The Journal of clinical investigation* **2020**, 130, 6325-6337, doi:10.1172/jci140378.
4. Goldman, S.; Hwang, E.; Lai, J.S.; Kocak, M.; Lulla, R.; Dhall, G.; Robison, N.; Onar-Thomas, A.; I, J.D. *Pdct-07. Feasibility Trial of Ttfelds (Tumor Treating Fields) for Children with Recurrent or Progressive Supratentorial High-Grade Glioma (Hgg) and Ependymoma: A Pediatric Brain Tumor Consortium Study: Pbtc-048*; Neuro Oncol. 2018 Nov;20(Suppl 6):vi201-2. doi: 10.1093/neuonc/noy148.837. Epub 2018 Nov 5.
5. Fangusaro, J.R.; Locatelli, F.; Garré, M.L.; Marshall, L.V.; Massimino, M.; Benettaib, B.; Biserna, N.; Poon, J.; Quan, J.; Conlin, E.; et al. A phase II clinical study of pomalidomide (CC-4047) monotherapy for children and young adults with recurrent or progressive primary brain tumors. **2019**, 37, 10035-10035, doi:10.1200/JCO.2019.37.15\_suppl.10035.
6. Gardner, S.L.; Allen, J.C.; Zaky, W.T.; Odia, Y.; Daghistani, D.; Khatib, Z.; Koschmann, C.J.; Aguilera, D.; MacDonald, T.J.; Chi, A.S.; et al. ONC201 in previously-irradiated pediatric H3 K27M-mutant glioma. **2019**, 37, 10046-10046, doi:10.1200/JCO.2019.37.15\_suppl.10046.
7. Puccetti, D.; Otto, M.; Morgenstern, D.; DeSantes, K.; Cho, S.; Hall, L.; Oliver, K.; Longcor, J. *Epct-09. Ctr 131 in Patients with Relapsed or Refractory Pediatric Malignancies*; Neuro Oncol. 2020 Dec 4;22(Suppl 3):iii305. doi: 10.1093/neuonc/noaa222.133. eCollection 2020 Dec.
8. Iannó, M.F.; Biassoni, V.; Schiavello, E.; Carenzo, A.; Boschetti, L.; Gandola, L.; Diletto, B.; Marchesi, E.; Vegetti, C.; Molla, A.; et al. A microRNA Prognostic Signature in Patients with Diffuse Intrinsic Pontine Gliomas through Non-Invasive Liquid Biopsy. *Cancers* **2022**, 14, doi:10.3390/cancers14174307.
9. Roberts, H.; Ravi, K.; Schepers, A.; Marini, B.; Kline, C.; Mueller, S.; Koschmann, C.; Franson, A. *Clrm-06. Comparison of Individualized Anti-Cancer Therapy Regimens Recommended by a Multidisciplinary Molecularly-Driven Tumor Board in a Pediatric Dipg Clinical Trial (Pnoc003) Versus Those Selected by the Cns-Tap Tool*; Neurooncol Adv. 2021 Sep 21;3(Suppl 4):iv2. doi: 10.1093/noajnl/vdab112.005. eCollection 2021 Oct.
10. DeNardo, B.; Foster, J.; Pinto, N.R.; Sholler, G.L.S.; Vo, K.T.; Desai, A.V.; Sun, J.; Wagner, L.M.; Macy, M.E.; Mody, R.; et al. Phase 1/2 study of elraglusib (9-ING-41), a small molecule selective glycogen synthase kinase-3 beta (GSK-3β) inhibitor, alone or with irinotecan, temozolomide/irinotecan or cyclophosphamide/topotecan in pediatric patients with refractory malignancies: Interim results. **2022**, 40, e22015-e22015, doi:10.1200/JCO.2022.40.16\_suppl.e22015.
11. Su, J.M.; Murray, J.C.; McNall-Knapp, R.Y.; Bowers, D.C.; Shah, S.; Adesina, A.M.; Paulino, A.C.; Jo, E.; Mo, Q.; Baxter, P.A.; et al. A phase 2 study of valproic acid and radiation, followed by maintenance valproic acid and bevacizumab in children with newly diagnosed diffuse intrinsic pontine glioma or high-grade glioma. *Pediatric blood & cancer* **2020**, 67, e28283, doi:10.1002/pbc.28283.
12. Su, J.M.; Kilburn, L.B.; Mansur, D.B.; Krailo, M.; Buxton, A.; Adekunle, A.; Gajjar, A.; Adamson, P.C.; Weigel, B.; Fox, E.; et al. Phase I/II trial of vorinostat and radiation and maintenance vorinostat in children with diffuse intrinsic pontine glioma: A Children's Oncology Group report. *Neuro-oncology* **2022**, 24, 655-664, doi:10.1093/neuonc/noab188.
13. Hipp, S.J.; Goldman, S.; Kaushal, A.; Krauze, A.; Citrin, D.; Glod, J.; Walker, K.; Shih, J.H.; Sethumadhavan, H.; O'Neill, K.; et al. A phase I trial of lenalidomide and radiotherapy in children with diffuse intrinsic pontine gliomas or high-grade gliomas. *Journal of neuro-oncology* **2020**, 149, 437-445, doi:10.1007/s11060-020-03627-0.
14. Bisbee, C.; Campagne, O.; Gajjar, A.; Tinkle, C.L.; Stewart, C.F. Population pharmacokinetics of crenolanib in children and young adults with brain tumors. *Cancer chemotherapy and pharmacology* **2022**, 89, 459-468, doi:10.1007/s00280-022-04412-8.
15. Bronk, J.K.; Hou, P.; Amsbaugh, M.J.; Khatua, S.; Mahajan, A.; Ketonen, L.; McGovern, S.L. Sequential Diffusion Tensor Imaging and Magnetic Resonance Spectroscopy in Patients Undergoing Reirradiation for Progressive Diffuse Intrinsic Pontine Glioma. *Advances in radiation oncology* **2022**, 7, 100847, doi:10.1016/j.adro.2021.100847.
16. Bander, E.D.; Ramos, A.D.; Wembacher-Schroeder, E.; Ivasyk, I.; Thomson, R.; Morgenstern, P.F.; Souweidane, M.M. Repeat convection-enhanced delivery for diffuse intrinsic pontine glioma. *Journal of neurosurgery. Pediatrics* **2020**, 26, 661-666, doi:10.3171/2020.6.Peds20280.
17. Baxter, P.A.; Su, J.M.; Onar-Thomas, A.; Billups, C.A.; Li, X.N.; Poussaint, T.Y.; Smith, E.R.; Thompson, P.; Adesina, A.; Ansell, P.; et al. A phase I/II study of veliparib (ABT-888) with radiation and temozolomide in newly diagnosed diffuse pontine glioma: a Pediatric Brain Tumor Consortium study. *Neuro-oncology* **2020**, 22, 875-885, doi:10.1093/neuonc/noaa016.

18. Zaghloul, M.S.; Eldebawy, E.; Ahmed, S.; Mousa, A.G.; Amin, A.; Refaat, A.; Zaky, I.; Elkhateeb, N.; Sabry, M. Hypofractionated conformal radiotherapy for pediatric diffuse intrinsic pontine glioma (DIPG): a randomized controlled trial. *Radiotherapy and oncology : journal of the European Society for Therapeutic Radiology and Oncology* **2014**, *111*, 35-40, doi:10.1016/j.radonc.2014.01.013.
19. Gibson, E.G.; Campagne, O.; Selvo, N.S.; Gajjar, A.; Stewart, C.F. Population pharmacokinetic analysis of crizotinib in children with progressive/recurrent high-grade and diffuse intrinsic pontine gliomas. *Cancer chemotherapy and pharmacology* **2021**, *88*, 1009-1020, doi:10.1007/s00280-021-04357-4.
20. Park, J.; Yea, J.W.; Park, J.W. Hypofractionated radiotherapy versus conventional radiotherapy for diffuse intrinsic pontine glioma: A systematic review and meta-analysis. *Medicine* **2020**, *99*, e22721, doi:10.1097/md.00000000000022721.
21. La, S.A.; Lee, J.Y.; Kim, D.H.; Song, E.L.; Park, J.H.; Ju, S.Y. Low Magnesium Levels in Adults with Metabolic Syndrome: a Meta-Analysis. *Biological trace element research* **2016**, *170*, 33-42, doi:10.1007/s12011-015-0446-9.
22. Van Den Bent, M.; Eoli, M.; Sepulveda, J.M.; Smits, M.; Walenkamp, A.; Frenel, J.S.; Franceschi, E.; Clement, P.M.; Chinot, O.; De Vos, F.; et al. INTELLANCE 2/EORTC 1410 randomized phase II study of Depatux-M alone and with temozolomide vs temozolomide or lomustine in recurrent EGFR amplified glioblastoma. *Neuro-oncology* **2020**, *22*, 684-693, doi:10.1093/neuonc/noz222.
23. Schuelke, M.R.; Gundelach, J.H.; Coffey, M.; West, E.; Scott, K.; Johnson, D.R.; Samson, A.; Melcher, A.; Vile, R.G.; Bram, R.J. Phase I trial of sargramostim/pelareorep therapy in pediatric patients with recurrent or refractory high-grade brain tumors. *Neuro-Oncology Advances* **2022**, *4*, doi:10.1093/noajnl/vdac085.
24. S. Johnson, T.; Pacholczyk, R.; Aguilera, D.; Al-Basheer, A.; Bajaj, M.; Berrong, Z.; Castellino, R.C.; Eaton, B.R.; Esiashvili, N.; Foreman, N.; et al. IMMU-04. FIRST-IN-CHILDREN PHASE 1B STUDY USING THE IDO PATHWAY INHIBITOR INDOXIMOD IN COMBINATION WITH RADIATION AND CHEMOTHERAPY FOR CHILDREN WITH NEWLY DIAGNOSED DIPG (NCT02502708, NLG2105). *Neuro-oncology* **2021**, *23*, i27-i27, doi:10.1093/neuonc/noab090.112 %J Neuro-Oncology.
25. Gállego Pérez-Larraya, J.; Garcia-Moure, M.; Labiano, S.; Patiño-García, A.; Dobbs, J.; Gonzalez-Huarriz, M.; Zalacain, M.; Marrodan, L.; Martinez-Velez, N.; Puigdelloses, M.; et al. Oncolytic DNX-2401 Virus for Pediatric Diffuse Intrinsic Pontine Glioma. *The New England journal of medicine* **2022**, *386*, 2471-2481, doi:10.1056/NEJMoa2202028.
26. Laetsch, T.W.; Janeway, K.A.; Hawkins, D.S.; Juszczak-Kosela, K.; Muscal, J.A.; Collier, A.B. Phase 2 study to evaluate palbociclib in combination with irinotecan and temozolomide in pediatric patients with recurrent or refractory Ewing sarcoma. **2022**, *40*, TPS11583-TPS11583, doi:10.1200/JCO.2022.40.16\_suppl.TPS11583.
27. Majzner, R.G.; Ramakrishna, S.; Yeom, K.W.; Patel, S.; Chinnasamy, H.; Schultz, L.M.; Richards, R.M.; Jiang, L.; Barsan, V.; Mancusi, R.; et al. GD2-CAR T cell therapy for H3K27M-mutated diffuse midline gliomas. *Nature* **2022**, *603*, 934-941, doi:10.1038/s41586-022-04489-4.
28. Bear, M.; DeNardo, B.; Federman, N.; Krystal, J.; Sholler, G.L.S.; Zhou, Y.; Knoderer, H.; Nabinger, S.C.; Hoffman, L.M. Phase 1b/2 study of abemaciclib combined with chemoimmunotherapy in pediatric and young adult patients with relapsed/refractory neuroblastoma (JPCS Part C). **2023**, *41*, TPS10068-TPS10068, doi:10.1200/JCO.2023.41.16\_suppl.TPS10068.
29. Theeler, B.J.; Jung, J.; Burton, E.; Leeper, H.; Wu, J.; Zaghloul, K.; Ray-Chaudhury, A.; Quezado, M.; Raffeld, M.; Yuan, Y.; et al. First-in-human dose escalation and food effect study of oral ONC206 in adults with recurrent primary CNS neoplasms. **2021**, *39*, TPS2072-TPS2072, doi:10.1200/JCO.2021.39.15\_suppl.TPS2072.
30. Ji, N.; Chen, G.; Wu, H.; Wang, Y.; Li, X.o.; Peng, L.; Xu, W.; Li, T.; Wang, Y.; Zhang, L.-F.; et al. H3.3-K27M neoantigen vaccine elicits anti-tumor T cell immunity against diffuse intrinsic pontine glioma: The phase I ENACTING trial. **2023**, *41*, 2052-2052, doi:10.1200/JCO.2023.41.16\_suppl.2052.
31. Patel, N.; Kilburn, L.B.; Fonseca, A.; Stabingas, K.; Clanton, R.; Marcus, S.; Vezina, G.; Nazarian, J.; Keating, R.F.; Packer, R.J. Phase 1/2, first-in-child study of sonodynamic therapy (SDT) using low intensity focused ultrasound and 5-aminolevulinic acid (ALA) for patients with diffuse intrinsic pontine glioma. **2023**, *41*, TPS10070-TPS10070, doi:10.1200/JCO.2023.41.16\_suppl.TPS10070.
32. McCrea, H.J.; Ivanidze, J.; O'Connor, A.; Hersh, E.H.; Boockvar, J.A.; Gobin, Y.P.; Knopman, J.; Greenfield, J.P. Intraarterial delivery of bevacizumab and cetuximab utilizing blood-brain barrier disruption in children with high-grade glioma and diffuse intrinsic pontine glioma: results of a phase I trial. *Journal of neurosurgery. Pediatrics* **2021**, *28*, 371-379, doi:10.3171/2021.3.Peds20738.
33. Abdelbaki, M.; Setty, B.; DeWire, M.D.; Cripe, T.P.; Curry, R. A pediatric and young adult phase I dose escalation study of BXQ-350 for solid and central nervous system tumors. **2020**, *38*, 2541-2541, doi:10.1200/JCO.2020.38.15\_suppl.2541.
